# Supplementary material for: Palmitic acid–induced microRNA-143-5p expression promotes the epithelial–mesenchymal transition of retinal pigment epithelium via negatively regulating JDP2
Source: publisher site journal article supplement (doi:10.18632/aging.204684), 2023-04-25
Supplement: Supplementary file [file aging-v15i9-204684-supplementary-material-SD1.pdf]

SUPPLEMENTARY FIGURE

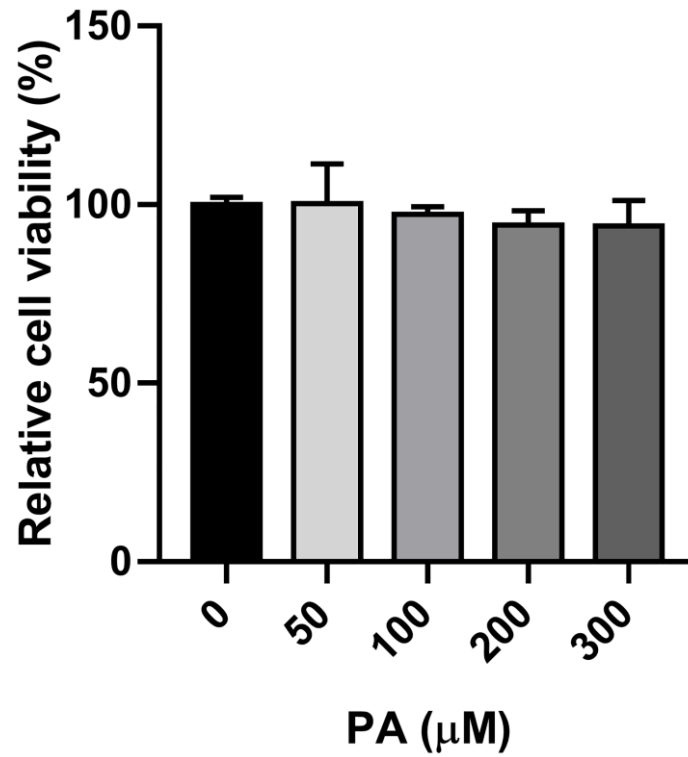

**Supplementary Figure 1.** PA at 0-300 μM did not decrease the viability of ARPE-19 cells. ARPE-19 cells were treated with PA at the indicated concentrations for 48 hours, and cell viability was evaluated by MTT assays.
