# Supplementary material for: Palmitic acid–induced microRNA-143-5p expression promotes the epithelial–mesenchymal transition of retinal pigment epithelium via negatively regulating JDP2
Source: publisher site journal article supplement (doi:10.18632/aging.204684), 2023-04-25
Supplement: Supplementary file [file aging-v15i9-204684-supplementary-material-SD2.pdf]

## SUPPLEMENTARY TABLES

**Supplementary Table 1. Quantitative PCR primer information.**

| <b>Name</b>                  | <b>Primer sequence</b>       |
|------------------------------|------------------------------|
| JDP2 forward primer          | 5'-CGGGGGACTGCATGGAAC-3'     |
| JDP2 reverse primer          | 5'-CCAGGCATCATAGCAGGAGG-3'   |
| E-cadherin forward primer    | 5'-TGGTTCAAGCTGCTGACCTT-3'   |
| E-cadherin reverse primer    | 5'-CTGACCCTTGTACGTGGTGG-3'   |
| $\alpha$ -SMA forward primer | 5'-CCACTGCTGCTTCTCTTC-3'     |
| $\alpha$ -SMA reverse primer | 5'-CGCCGACTCCATTCCAAT-3'     |
| Snail forward primer         | 5'-CCAGTGCCTCGACCACTATG-3'   |
| Snail reverse primer         | 5'-CTGCTGGAAGGTAACCTCTGGA-3' |
| Vimentin forward primer      | 5'-GGACCAGCTAACCAACGACA-3'   |
| Vimentin reverse primer      | 5'-TCCTCCTGCAATTTCTCCCG-3'   |
| GAPDH forward primer         | 5'-AATGGGCAGCCGTTAGGAAA-3'   |
| GAPDH reverse primer         | 5'-GCGCCCAATACGACCAAATC-3'   |
| miR-143-5p forward primer    | 5'-GCGCAGCGCCCTGTCTCC-3'     |
| miR-143-5p reverse primer    | 5'-GCTGCAGAACAACCTTCTC-3'    |
| U6 forward primer            | 5'-GTGCTCGCTTCGGCAGCAC-3'    |
| U6 reverse primer            | 5'-AAATATGGAACGCTTCAC-3'     |
| fibronectin forward primer   | 5'-TCTGTGCCTCCTATCTATGTGC-3' |
| fibronectin reverse primer   | 5'-GAGGGACCACGACAACCTCTTC-3' |

**Supplementary Table 2. Antibodies used in the study.**

| <b>Antibody</b> | <b>Brand</b> | <b>Cat. No.</b> | <b>Working concentration</b> |
|-----------------|--------------|-----------------|------------------------------|
| E-cadherin      | Abcam        | ab40772         | 1:30,000 (monoclonal)        |
| $\alpha$ -SMA   | CST          | 19245           | 1:1000 (monoclonal)          |
| Fibronectin     | Abcam        | ab268020        | 1:1000 (monoclonal)          |
| Snail           | Abcam        | ab216347        | 1:1000 (monoclonal)          |
| Vimentin        | Abcam        | ab92547         | 1:2000 (monoclonal)          |
| JDP2            | Abcam        | ab40916         | 1 $\mu$ g/mL                 |
| $\beta$ -actin  | Abcam        | ab8226          | 1 $\mu$ g/mL                 |
